# Supplementary material for: Design and construction of hollow metal sulfide/selenide core–shell heterostructure arrays for hybrid supercapacitor
Source: Royal Society of Chemistry journal article supplement (doi:10.1039/d3dt04245f), 2024-01-01
Supplement: d3dt04245f1.pdf [file d3dt04245f1.pdf]

## Supporting information

### Design and construction of hollow metal sulfides/selenides core-shell heterostructure arrays for hybrid supercapacitor

Shuangxing Cui <sup>a</sup>, Guochang Li <sup>a</sup>, Xunwen Xiao <sup>b,\*</sup>, Lei Wu<sup>a</sup>, Lei Han <sup>a,\*</sup>

<sup>a</sup> State Key Laboratory Base of Novel Functional Materials and Preparation Science, School of Materials Science & Chemical Engineering, Ningbo University, Ningbo, Zhejiang 315211, China

<sup>b</sup> College of Material Science and Chemical Engineering, Ningbo University of Technology, Ningbo, Zhejiang 315211, China

\* Corresponding Author. E-mail: [xunwenxiao@nbut.edu.cn](mailto:xunwenxiao@nbut.edu.cn) (Xiao); [hanlei@nbu.edu.cn](mailto:hanlei@nbu.edu.cn) (Han)

#### Experimental

##### Materials:

Commercial nickel foam (NF, thickness: 1.7 mm, pore diameter distribution: 0.2–0.5 mm), hydrochloric acid (HCl, 35–38%), cobalt chloride hexahydrate (CoCl<sub>2</sub>·6H<sub>2</sub>O), nickel chloride hexahydrate (NiCl<sub>2</sub>·6H<sub>2</sub>O), urea (CO(NH<sub>2</sub>)<sub>2</sub>), sodium sulfide (Na<sub>2</sub>S·9H<sub>2</sub>O), Lithium chloride (LiCl) and selenium dioxide (SeO<sub>2</sub>) were obtained from Sinopharm Chemical Reagent Co., Ltd. All chemicals in the experiments were of analytical grade and used as received without any further purification.

##### Characterization:

We scrape the synthetic sample from the NF and use a magnet to suck up the nickel chips for all characterization. Crystal information of the sample was characterized by an X-ray diffractometer (XRD, Bruker D8 Advance) with Cu K $\alpha$  radiation. The microstructure was characterized by scanning electron microscopy (SEM, Hitachi S-4800) and transmission electron microscopy (TEM, FEI TalosF200x). Elements analysis and valence states on the surface of products were characterized by X-ray Photoelectron Spectroscopy. The specific surface area was obtained by nitrogen adsorption-desorption with the Brunauer–Emmett–Teller (BET) model, and the pore size

distribution was achieved by the Barrette-Joynere-Halenda (BJH) model. The types and contents of its elements are analyzed using energy dispersive spectroscopy (EDS) attached to a TEM device.

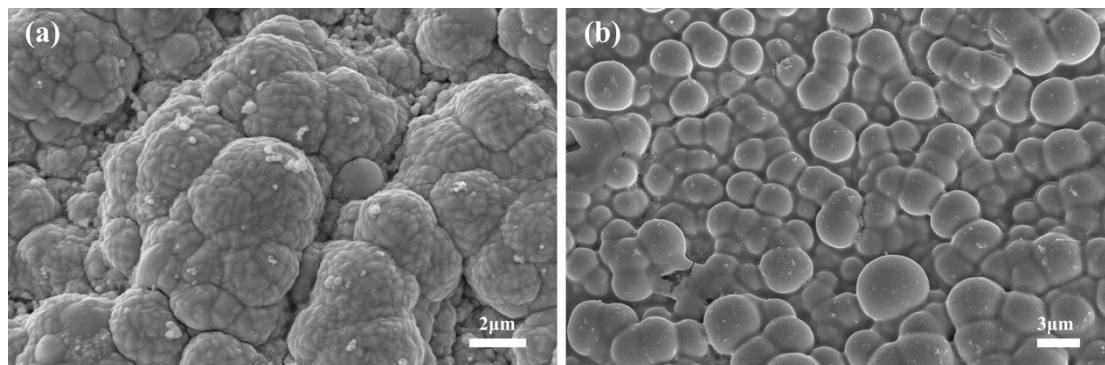

**Fig. S1** SEM of (a) NiSe<sub>2</sub> and (b) Co<sub>0.85</sub>Se.

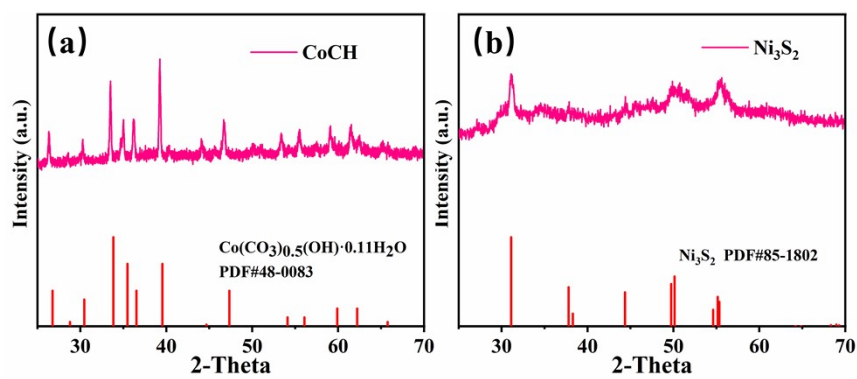

**Fig. S2** XRD of (a) CoCH and (b) Ni<sub>3</sub>S<sub>2</sub>.

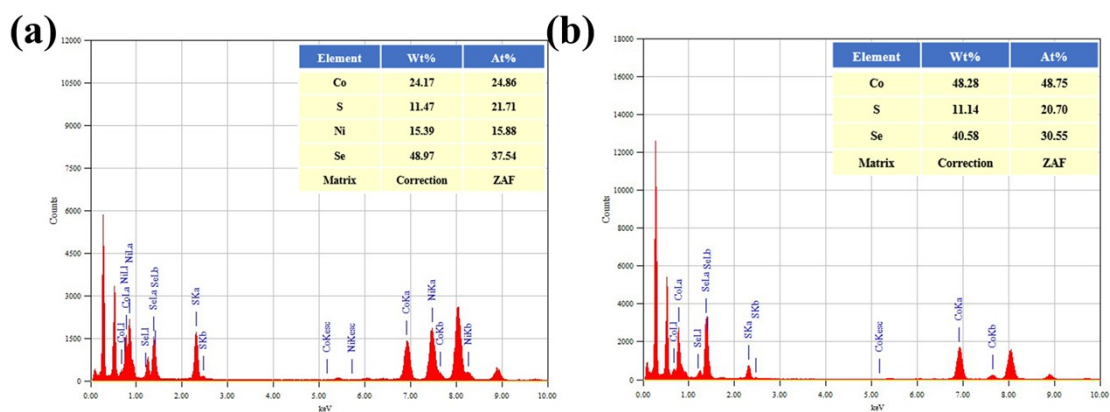

Fig. S3 EDS spectrum of (a)  $\text{NiSe}_2@Co_9S_8$  and (b)  $Co_{0.85}Se@Co_9S_8$ .

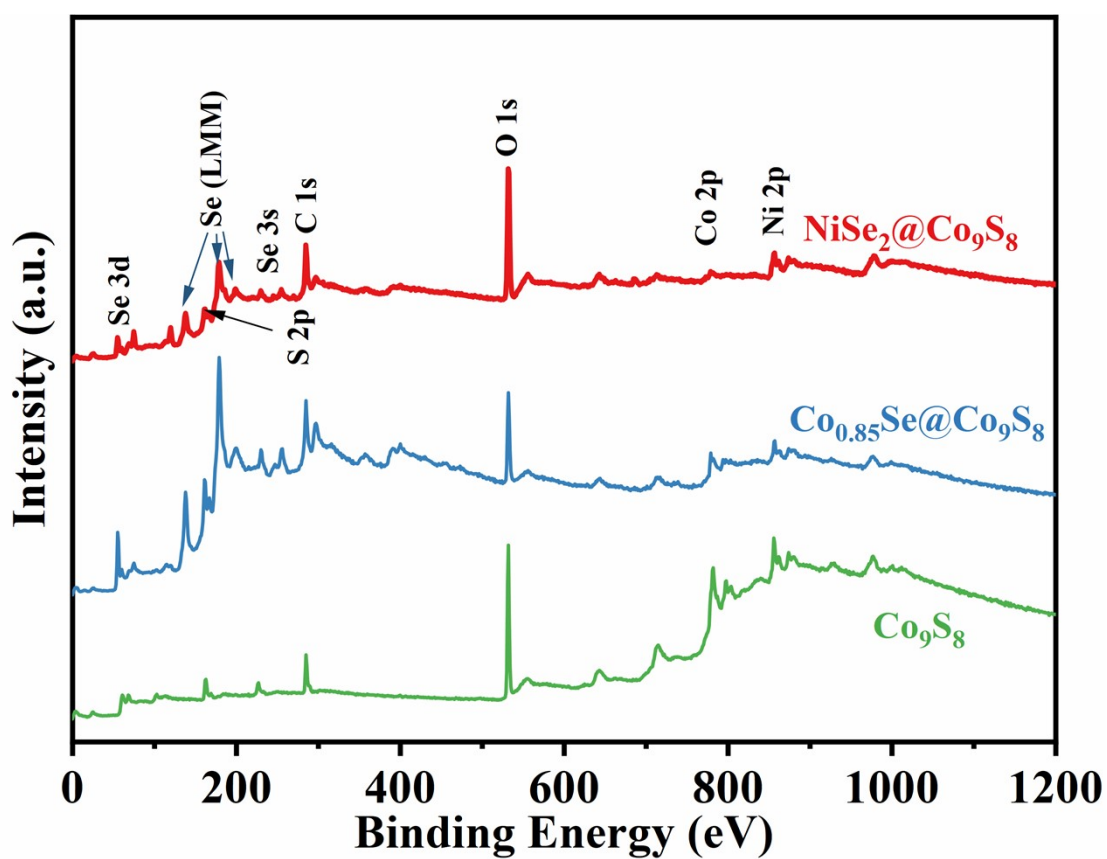

Fig. S4 XPS survey spectrum of  $\text{NiSe}_2@Co_9S_8$ ,  $Co_{0.85}Se@Co_9S_8$  and  $Co_9S_8$ .

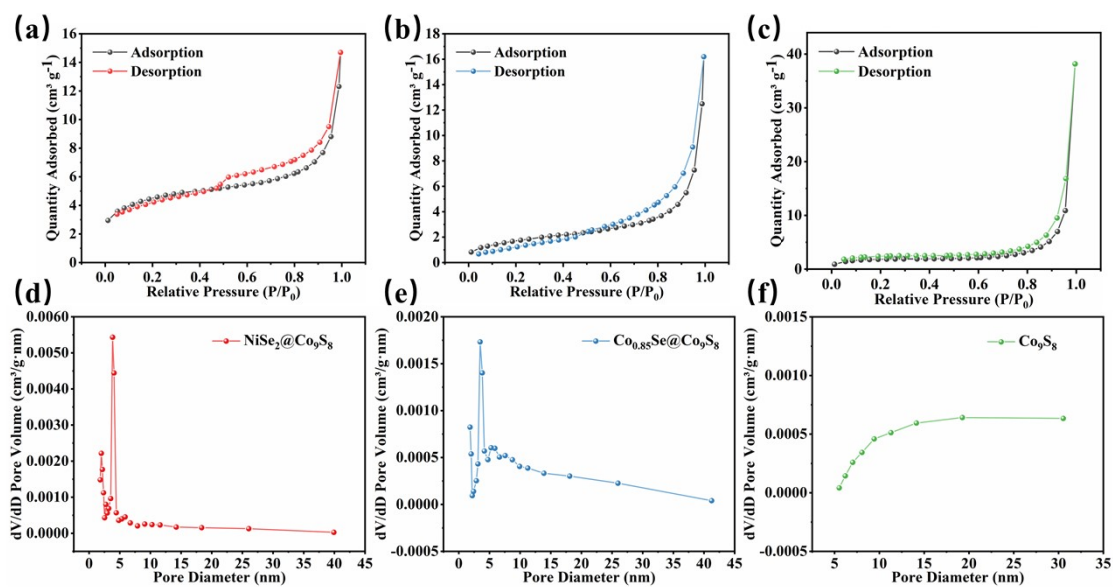

**Fig. S5** Nitrogen adsorption-desorption isotherms of (a) NiSe<sub>2</sub>@Co<sub>9</sub>S<sub>8</sub>, (b) Co<sub>0.85</sub>Se@Co<sub>9</sub>S<sub>8</sub> and (c) Co<sub>9</sub>S<sub>8</sub>; Pore diameter distribution of (d) NiSe<sub>2</sub>@Co<sub>9</sub>S<sub>8</sub>, (e) Co<sub>0.85</sub>Se@Co<sub>9</sub>S<sub>8</sub> and (f) Co<sub>9</sub>S<sub>8</sub>.

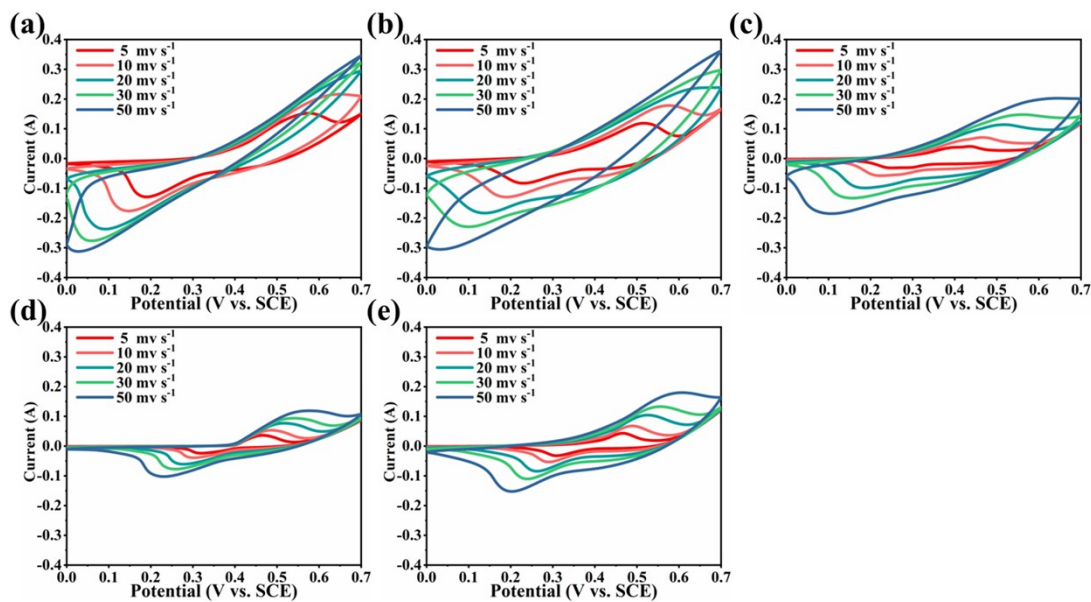

**Fig. S6** CV curves of (a) NiSe<sub>2</sub>@Co<sub>9</sub>S<sub>8</sub>, (b) Co<sub>0.85</sub>Se@Co<sub>9</sub>S<sub>8</sub>, (c) Co<sub>9</sub>S<sub>8</sub>, (d) NiSe<sub>2</sub>, and (e) Co<sub>0.85</sub>Se at different scan rates.

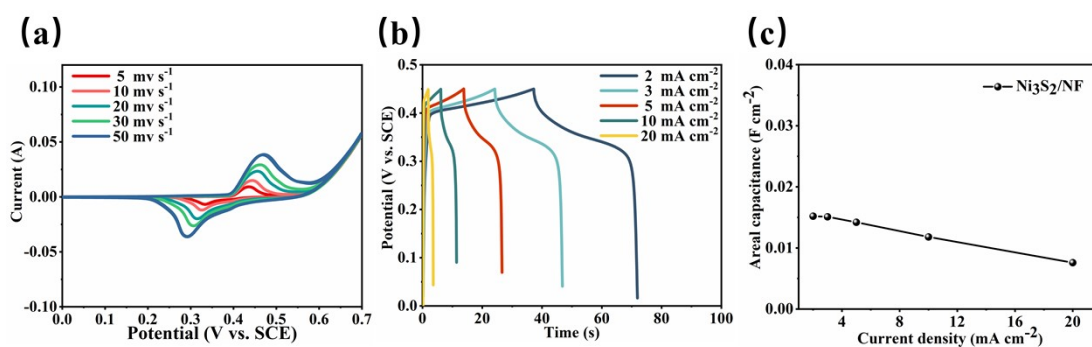

**Fig. S7** (a) CV curves of Ni<sub>3</sub>S<sub>2</sub> NF at different scan rates from 5 to 50 mV s<sup>-1</sup>, (b) GCD curves of Ni<sub>3</sub>S<sub>2</sub> NF at different current densities from 2 to 20 mA cm<sup>-2</sup> and (c) areal capacity at different current densities of Ni<sub>3</sub>S<sub>2</sub> NF.

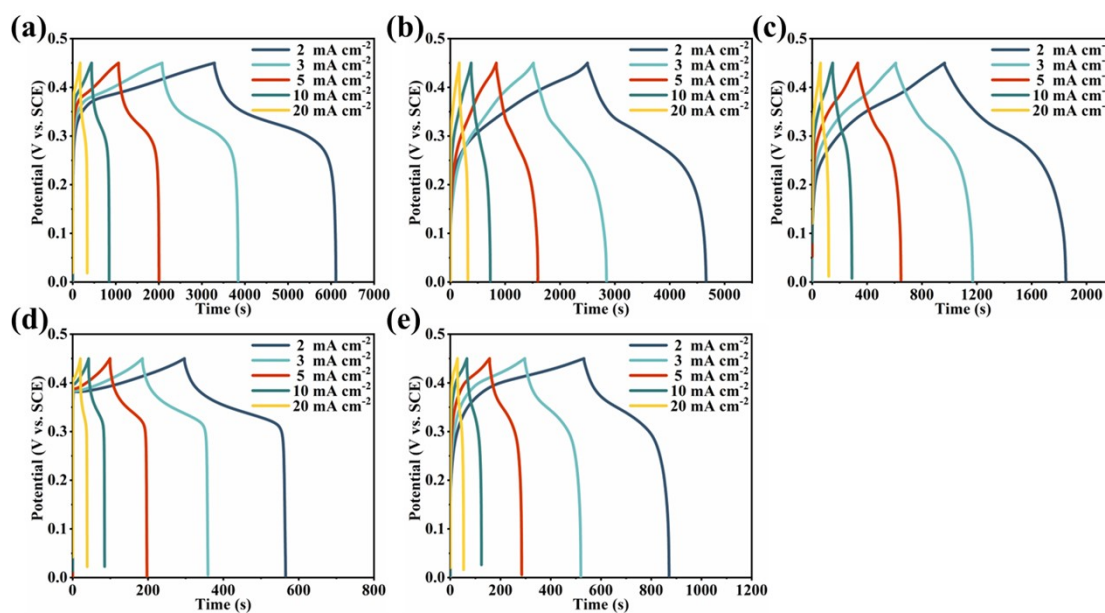

**Fig. S8** CP curves of (a) NiSe<sub>2</sub>@Co<sub>9</sub>S<sub>8</sub>, (b) Co<sub>0.85</sub>Se@Co<sub>9</sub>S<sub>8</sub>, (c) Co<sub>9</sub>S<sub>8</sub>, (d) NiSe<sub>2</sub>, and (e) Co<sub>0.85</sub>Se at different current densities.

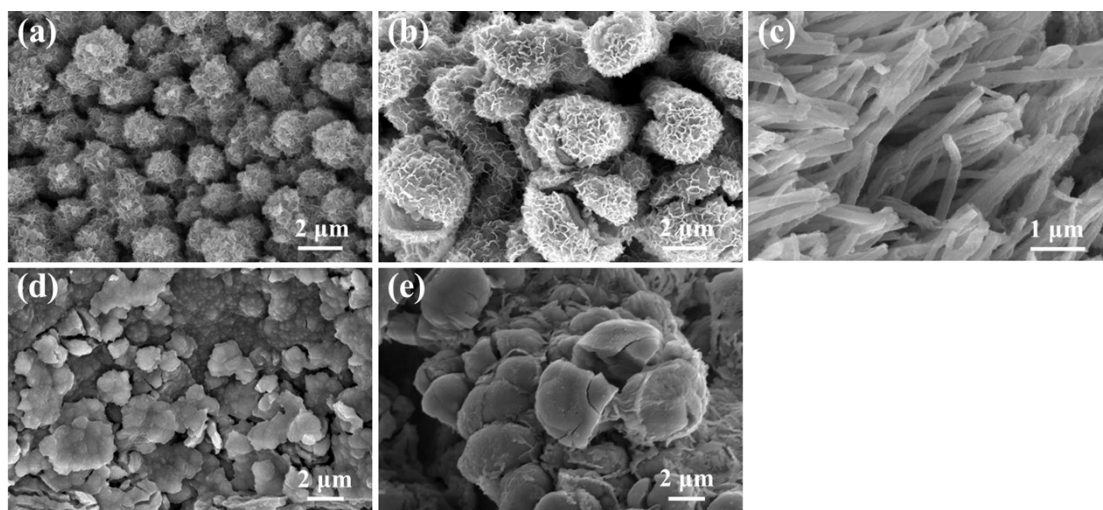

**Fig. S9** SEM images of (a)  $\text{NiSe}_2@\text{Co}_9\text{S}_8$ , (b)  $\text{Co}_{0.85}\text{Se}@\text{Co}_9\text{S}_8$ , (c)  $\text{Co}_9\text{S}_8$ , (d)  $\text{NiSe}_2$ , and (e)  $\text{Co}_{0.85}\text{Se}$  after 5000 cycles.

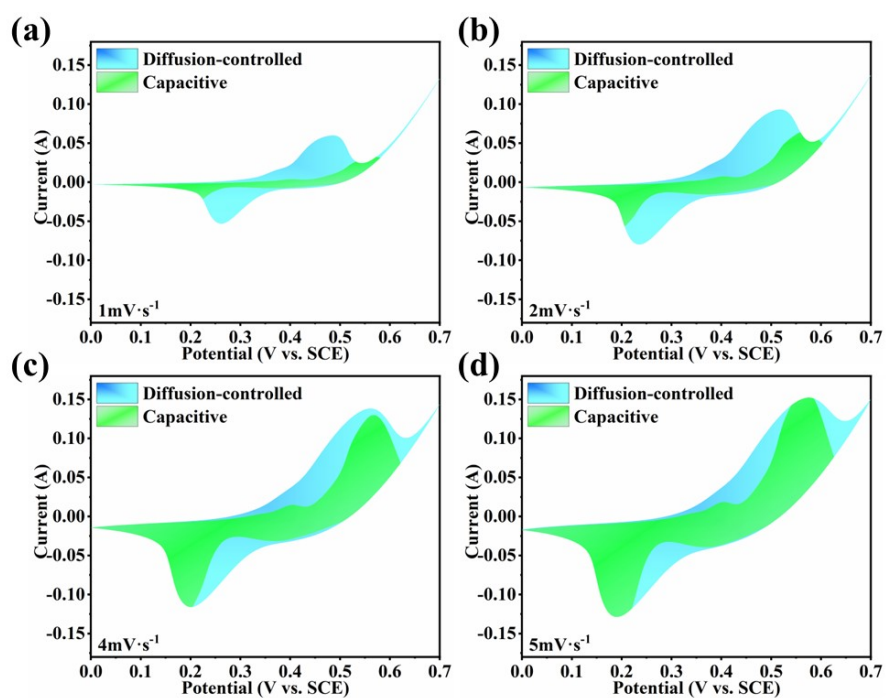

**Fig. S10** CV curves of  $\text{NiSe}_2@\text{Co}_9\text{S}_8$  with the capacitive and diffusion-controlled fraction shown by the shaded region at (a)  $1 \text{ mV}\cdot\text{s}^{-1}$ , (b)  $2 \text{ mV}\cdot\text{s}^{-1}$ , (c)  $4 \text{ mV}\cdot\text{s}^{-1}$  and (d)  $5 \text{ mV}\cdot\text{s}^{-1}$ .

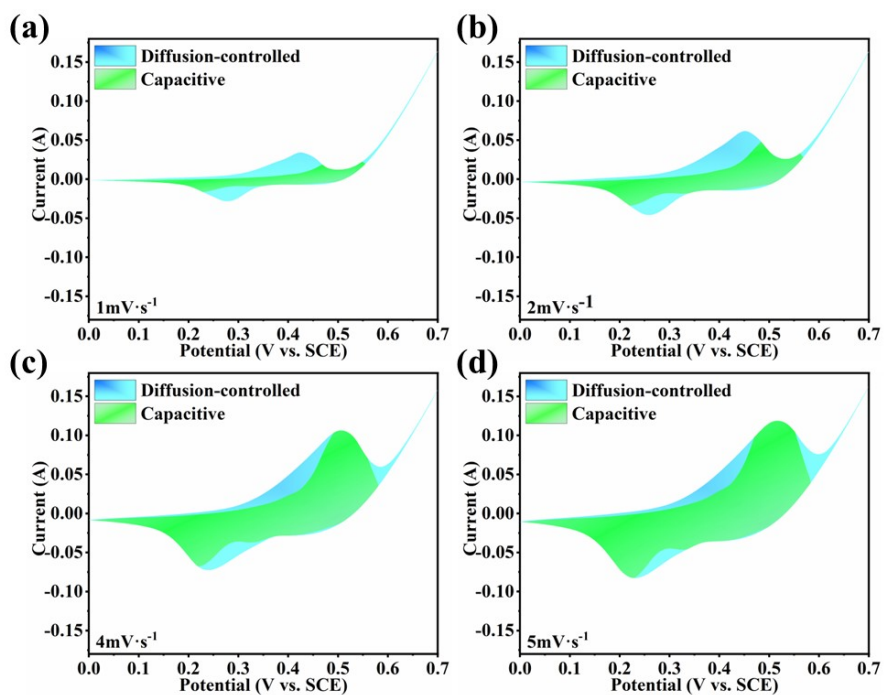

**Fig. S11** CV curves of  $\text{Co}_{0.85}\text{Se}@ \text{Co}_9\text{S}_8$  with the capacitive and diffusion-controlled fraction shown by the shaded region at (a)  $1 \text{ mV} \cdot \text{s}^{-1}$ , (b)  $2 \text{ mV} \cdot \text{s}^{-1}$ , (c)  $4 \text{ mV} \cdot \text{s}^{-1}$  and (d)  $5 \text{ mV} \cdot \text{s}^{-1}$ .

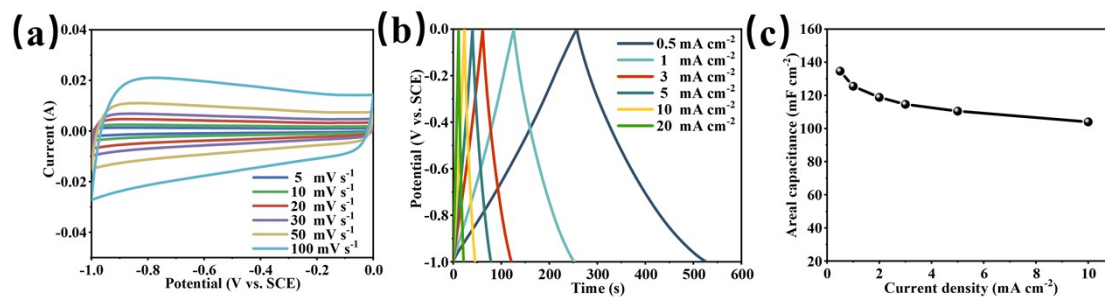

**Fig. S12** (a) CV curves at different scan rates, (b) GCD curves at different current densities and (c) specific capacitance at different current densities of activated carbon.

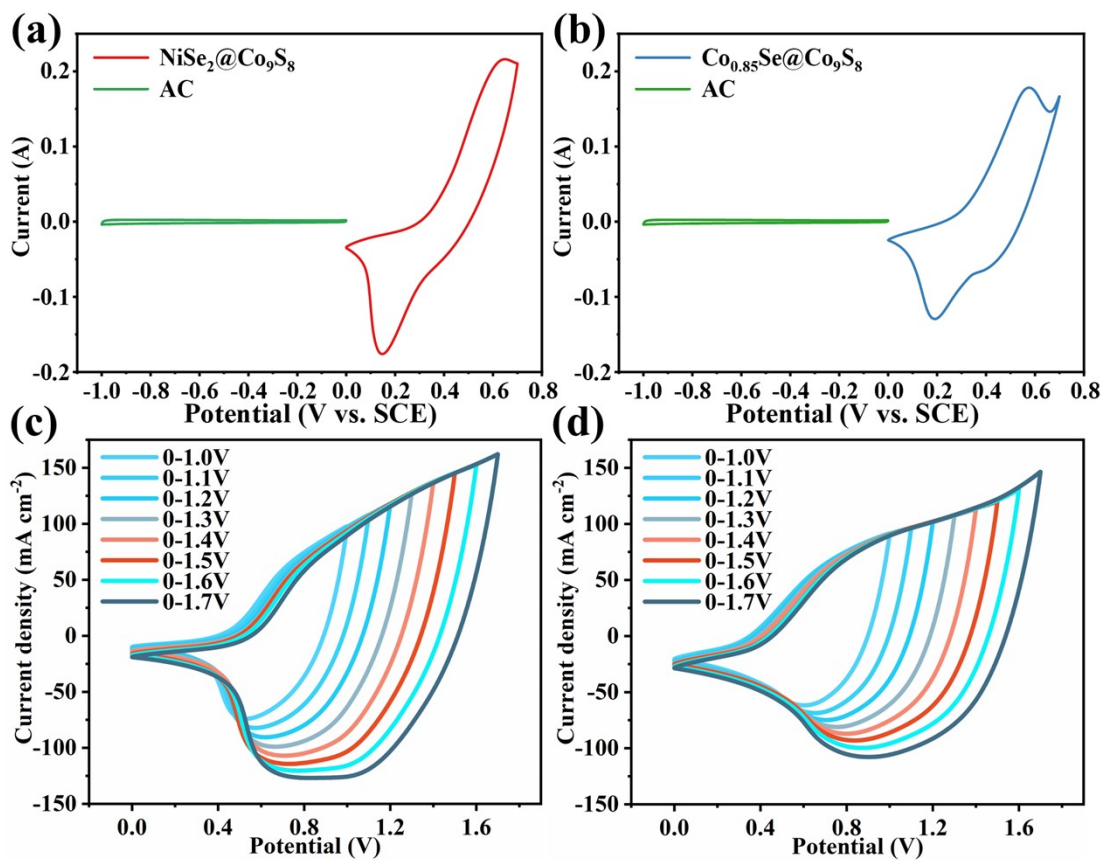

**Fig. S13** CV curves of AC and (a)  $\text{NiSe}_2@Co_9S_8$  and (b)  $Co_{0.85}Se@Co_9S_8$  at  $10\ mV\ s^{-1}$  and CV curves of (c)  $\text{NiSe}_2@Co_9S_8//AC$  and (d)  $Co_{0.85}Se@Co_9S_8//AC$  in different potential windows at a scan rate of  $50\ mV\ s^{-1}$ .



**Table S1** Performance comparison of supercapacitors.

| Electrode materials                                                      | Capacitance               | Current density          | Electrolyte                         | Ref       |
|--------------------------------------------------------------------------|---------------------------|--------------------------|-------------------------------------|-----------|
| CoSe <sub>2</sub> @ZnS                                                   | 953.3 F g <sup>-1</sup>   | 1 A g <sup>-1</sup>      | 3 M KOH                             | S1        |
| Co <sub>0.85</sub> Se@CoNi <sub>2</sub> S <sub>4</sub> /GF               | 5.25 F cm <sup>-2</sup>   | 1 m A cm <sup>-2</sup>   | 2 M KOH                             | S2        |
| NiSe <sub>2</sub> @CNT                                                   | 980.5 F g <sup>-1</sup>   | 1 A g <sup>-1</sup>      | 6 M KOH                             | S3        |
| Co <sub>9</sub> S <sub>8</sub> @MnO <sub>2</sub>                         | 3.7 F cm <sup>-2</sup>    | 1 m A cm <sup>-2</sup>   | 1 M Na <sub>2</sub> SO <sub>4</sub> | S4        |
| Co <sub>9</sub> S <sub>8</sub> @NiMn oxide                               | 5.34 F cm <sup>-2</sup>   | 1 m A cm <sup>-2</sup>   | 1 M LiOH                            | S5        |
| NiSe/Ni(OH) <sub>2</sub>                                                 | 2725.69 F g <sup>-1</sup> | 5 m A cm <sup>-2</sup>   | 3 M KOH                             | S6        |
| NiSe nanoarrays                                                          | 1.55 F cm <sup>-2</sup>   | 4 m A cm <sup>-2</sup>   | 1 M KOH                             | S7        |
| NiSe@NiCo(CO <sub>3</sub> )(OH) <sub>2</sub>                             | 6.89 F cm <sup>-2</sup>   | 4 m A cm <sup>-2</sup>   | 1 M KOH                             | S8        |
| NiCo <sub>2</sub> Se <sub>4</sub>                                        | 6.21 F cm <sup>-2</sup>   | 1 m A cm <sup>-2</sup>   | 6 M KOH                             | S9        |
| Ni <sub>3</sub> S <sub>2</sub> @Co <sub>9</sub> S <sub>8</sub> nanotubes | 8.24 F cm <sup>-2</sup>   | 2 m A cm <sup>-2</sup>   | 6 M KOH                             | S10       |
| Co <sub>3</sub> O <sub>4</sub> /carbon foam                              | 106 F g <sup>-1</sup>     | 0.1 V s <sup>-1</sup>    | 1 M NaOH                            | S11       |
| Pr <sub>6</sub> O <sub>11</sub> @Ni-Co oxides                            | 1635 F g <sup>-1</sup>    | 0.5 m A cm <sup>-2</sup> | 2 M KOH                             | S12       |
| NiSe <sub>2</sub> @Co <sub>9</sub> S <sub>8</sub>                        | 12.54 F cm <sup>-2</sup>  | 2 m A cm <sup>-2</sup>   | 2 M KOH                             | This work |
| Co <sub>0.85</sub> Se@Co <sub>9</sub> S <sub>8</sub>                     | 9.61 F cm <sup>-2</sup>   |                          |                                     |           |

## References

- S1. S. A. Ahmad, M. Z. U. Shah, I. Hussain, M. Arif, P. Song, S. I. Al-Saeedi, M. Sajjad, I. Ahmad, J. Aftab, T. H. Huang and A. Shah, *J. Energy Storage*, 2023, **73**, 109090.
- S2. C. Zhang, M. Hou, X. Cai, J. Lin, X. Liu, R. Wang, L. Zhou, J. Gao, B. Li and L. Lai, *J. Mater. Chem. A*, 2018, **6**, 15630-15639.
- S3. Y. Y. Zheng, Y. R. Tian, S. Sarwar, J. J. Luo and X. Y. Zhang, *J. Power Sources*, 2020, **452**, 227793.
- S4. Q. Li, M. Liu, F. Huang, X. Zuo, X. Wei, S. Li and H. Zhang, *Chem. Eng. J.*, 2022, **437**, 135494.
- S5. H. Qian, M. J. Liu, H. Zhang, X. Wei, H. Zhang, S. K. Li and F. Z. Huang, *Electrochim. Acta*, 2021, **399**, 139378.

- S6. L. He, Y. Wang, Y. Guo, G. Li, X. Zhang and W. Cai, *Nanotechnology*, 2021, **32**, 345706.
- S7. H. Chen, L. T. Wu, K. Y. Zhang, A. M. Qin and S. P. Chen, *Int. J. Electrochem. Sci.*, 2018, **13**, 12437-12449.
- S8. H. Gu, Y. Zeng, S. Wan, S. Zhang, Q. Zhong and Y. Bu, *J. Mater. Chem. A*, 2021, **9**, 16099-16107.
- S9. R. Yang, Y. Zhang, X. Huang, H. Q. Yin, Y. Y. Mo, K. Y. Zhang, A. M. Qin, S. P. Chen and S. G. Dai, *Ionics*, 2023, **29**, 3353-3363.
- S10. Y. Lin, X. Chen, P. Chang, Z. Liu, G. Ren and J. Tao, *J. Alloys Compd.*, 2022, **900**, 163503.
- S11. Z. Xu, A. Younis, D. Chu, Z. Ao, H. Xu and S. Li, *J. Nanomater.*, 2014, **2014**, 1-5.
- S12. N. Chen, A. Younis, S. Huang, D. Chu and S. Li, *J. Alloys Compd.*, 2019, **783**, 772-778.
